# Supplementary material
Source: Springer Nature journal article supplement (https://www.springermedizin.de/resource/supplementary/13058_2013_3456_MOESM5_ESM.pdf/9704078)
Supplement: MOESM5 [file 9704078]

**Supplementary Table 1: Clinical and pathological characteristics.**

|                         | IMPC [n (%)]     | IDC-NST [n (%)] | <i>p</i> -val        |
|-------------------------|------------------|-----------------|----------------------|
| Number of patients      | 39               | 27              |                      |
| Median FU, yrs [range]  | 6.3 [0.6 ; 10.7] | 4.0 [0.9 ; 13]  |                      |
| Median age, yrs [range] | 62 [34 ; 84]     | 60 [38 ; 85]    |                      |
| < 50                    | 8 (21)           | 7 (26)          | <i>ns</i>            |
| > 50                    | 31 (79)          | 20 (74)         | <i>ns</i>            |
| Tumor size, cm          |                  |                 |                      |
| < 2                     | 28 (72)          | 6 (22)          | $7.4 \times 10^{-5}$ |
| 2 to 5                  | 9 (23)           | 17 (63)         | $1.1 \times 10^{-3}$ |
| > 5                     | 2 (5)            | 4 (15)          | <i>ns</i>            |
| Grade                   |                  |                 |                      |
| I                       | 3 (8)            | 5 (19)          | <i>ns</i>            |
| II                      | 20 (51)          | 14 (52)         | <i>ns</i>            |
| III                     | 15 (38)          | 8 (30)          | <i>ns</i>            |
| Not specified           | 1 (3)            | 0 (0)           |                      |
| ER                      |                  |                 |                      |
| Positive                | 39 (100)         | 27 (100)        | <i>ns</i>            |
| Negative                | 0 (0)            | 0 (0)           |                      |
| ERBB2                   |                  |                 |                      |
| Positive                | 10 (26)          | 7 (26)          | <i>ns</i>            |
| Negative                | 26 (66)          | 16 (70)         |                      |
| Not specified           | 3 (8)            | 1 (4)           |                      |

**Legends:** Median FU, yrs: median follow-up in years; ER: estrogen receptor; IMPC: invasive micropapillary carcinoma; IDC-NST: invasive carcinomas of no special type.
